# Supplementary material
Source: Springer Nature journal article supplement (https://www.springermedizin.de/resource/supplementary/13561_2012_23_MOESM1_ESM.pdf/9687298)

1<sup>st</sup> year

2<sup>nd</sup> year

3<sup>rd</sup> year

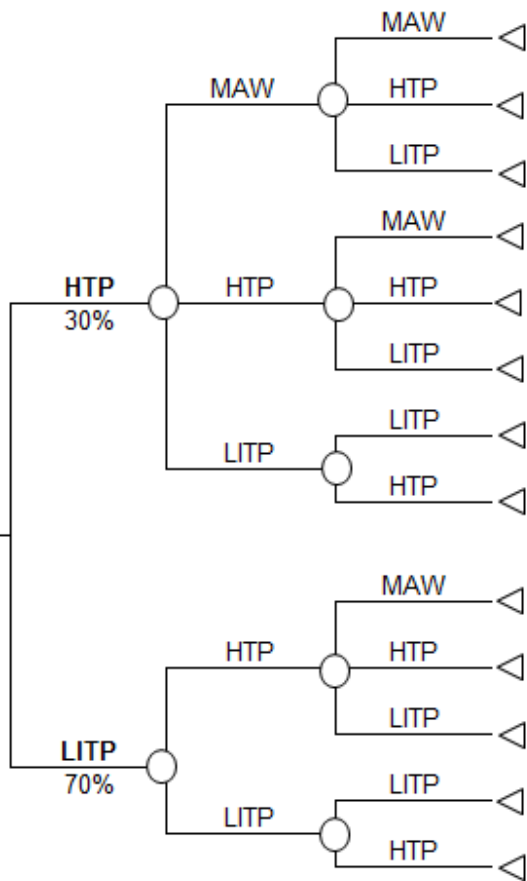

Supplement: MOESM1 [file 9687298]
